# Supplementary material for: A hierarchical 3D-motion learning framework for animal spontaneous behavior mapping
Source: PubMed Central journal article supplement (PMC8119960; doi:10.1038/s41467-021-22970-y), 2021-05-13
Supplement: 41467_2021_22970_MOESM11_ESM.pdf [file 41467_2021_22970_MOESM11_ESM.pdf]

**Title:** Supplementary Movie 1

**Description:** Demonstration of four-view mouse video capturing and 3D tracking

**Title:** Supplementary Movie 2

**Description:** Demonstration of behavior decomposition

**Title:** Supplementary Movie 3

**Description:** Demonstration of behavior mapping with low-dimensionality embedding

**Title:** Supplementary Movie 4

**Description:** Test in square open field

**Title:** Supplementary Movie 5

**Description:** Test in sociability cage

**Title:** Supplementary Movie 6

**Description:** 3D tracking 2 mice with different appearances

**Title:** Supplementary Movie 7

**Description:** 3D tracking 2 mice with similar appearances
